# Supplementary material for: Incremental Experience in In Vitro Primary Culture of Human Pulmonary Arterial Endothelial Cells Harvested from Swan-Ganz Pulmonary Arterial Catheters
Source: MDPI journal article supplement (doi:10.3390/cells10113229), 2021-11-19
Supplement: s1 [file s1]

Article

# Incremental experience in *in vitro* primary culture of human pulmonary arterial endothelial cells harvested from *Swan-Ganz* pulmonary arterial catheters

Birger Tielemans<sup>1</sup>, Leanda Stoian<sup>2</sup>, Allard Wagenaar<sup>2</sup>, Mathias Leys<sup>3</sup>, Catharina Belge<sup>4</sup>, Marion Delcroix<sup>4</sup> and Rozenn Quarck<sup>4, \*</sup>

<sup>1</sup> Laboratory of Respiratory Diseases & Thoracic Surgery (BREATHE), Department of Chronic Diseases & Metabolism (CHROMETA) & Biomedical MRI, Department of Imaging and Pathology, University of Leuven, Leuven, Belgium.

<sup>2</sup> Laboratory of Respiratory Diseases & Thoracic Surgery (BREATHE), Department of Chronic Diseases & Metabolism (CHROMETA), University of Leuven, Leuven, Belgium.

<sup>3</sup> Clinical Department of Respiratory Diseases, University Hospitals, University of Leuven, Leuven, Belgium.

<sup>4</sup> Laboratory of Respiratory Diseases & Thoracic Surgery (BREATHE), Department of Chronic Diseases & Metabolism (CHROMETA), University of Leuven, Clinical Department of Respiratory Diseases, University Hospitals, University of Leuven, Leuven, Belgium.

*Supplemental Data*

**Table S1.** Patient characteristics from whom cells were phenotyped (n=4/56).

|                                     | Successful (n=52) | Phenotyping (n=4) | p-value |
|-------------------------------------|-------------------|-------------------|---------|
| <b>Age, years</b>                   | 64 (27-89)        | 64 (46-81)        | 0.80    |
| <b>Gender, male (%)</b>             | 37                | 25                |         |
| <b>BMI kg/m<sup>2</sup></b>         | 24 (18-47)        | 26 (24-44)        | 0.31    |
| <b>Etiology (%)</b>                 |                   |                   |         |
| <i>IPAH</i>                         | 14                | 25                |         |
| <i>HPAH</i>                         | 2                 | -                 |         |
| <i>Drug/toxin</i>                   | 3                 | 25                |         |
| <i>APAH</i>                         | 3                 | -                 |         |
| <i>PVOD</i>                         | 2                 | -                 |         |
| <i>PH sec to HD</i>                 | 1                 | -                 |         |
| <i>PAH sec to LD</i>                | 2                 | -                 |         |
| <i>CTEPH</i>                        | 13                | 50                |         |
| <i>No PH</i>                        | 4                 | -                 |         |
| <b>PAH-specific therapy (%)</b>     |                   |                   |         |
| <i>treatment-naïve</i>              | 48                | 25                |         |
| <i>monotherapy</i>                  | 15                | 25                |         |
| <i>dual therapy</i>                 | 21                | 50                |         |
| <i>triple therapy</i>               | 19                | -                 |         |
| <i>CCB</i>                          | 4                 | -                 |         |
| <b>NYHA FC</b>                      |                   |                   | 0.63    |
| <i>I</i>                            | 5                 | -                 |         |
| <i>II</i>                           | 23                | 2                 |         |
| <i>III</i>                          | 22                | 1                 |         |
| <i>IV</i>                           | 2                 | 1                 |         |
| <b>RAP (mmHg)</b>                   | 7 (2- 25)         | 11 (2-11)         | 0.86    |
| <b>mPAP (mmHg)</b>                  | 39.5 (11-70)      | 48 (32-51)        | 0.54    |
| <b>PAWP (mmHg)</b>                  | 10 (4-57)         | 7 (5-12)          | 0.24    |
| <b>PVR (dyn.s.sec<sup>-5</sup>)</b> | 539 (61-2187)     | 690 (330-906)     | 0.61    |
| <b>CI (L/min/m<sup>2</sup>)</b>     | 2.5 (1.1-3.9)     | 2.4 (1.6-2.9)     | 0.68    |
| <b>SvO<sub>2</sub> (%)</b>          | 65 (39-80)        | 63 (50-73)        | 0.57    |
| <b>6-MWD (m)</b>                    | 386 (60-580)      | 324 (72-552)      | 0.71    |
| <b>NT-proBNP (ng/mL)</b>            | 753 (53-21834)    | 2131 (403-3694)   | 0.36    |

Among successful cultures, 4 patients were randomly selected for extensive phenotyping. Results are expressed median (min-max). BMI, body mass index; IPAH, idiopathic pulmonary arterial hypertension; HPAH, heritable PAH; APAH, associated PAH (including associations with connective tissue disease (CTD), congenital heart defects (CHD), porto-PH (PoPH) and HIV); PVOD, pulmonary veno-occlusive disease; PH due to HD, pulmonary hypertension secondary to heart disease; PH due to LD, PH secondary to lung disease; CCB, calcium channel blockers; RAP, right atrial pressure; mPAP, mean pulmonary arterial pressure; PAWP, pulmonary arterial wedge pressure; PVR, pulmonary vascular resistance; CI, cardiac index; SvO<sub>2</sub>, mixed venous oxygen saturation; 6-MWD, six-minute walking distance; NT-proBNP, N-Terminal-pro-brain natriuretic peptide.

**Table S2.** Summary of catheter collection and cell harvest conditions according to different protocols

|                     |                         | Pollet <i>et al.</i> <sup>1</sup> | Passineau <i>et al.</i> <sup>2</sup> | Ventetuolo <i>et al.</i> <sup>3</sup> | Tielemans <i>et al.</i>                |
|---------------------|-------------------------|-----------------------------------|--------------------------------------|---------------------------------------|----------------------------------------|
| Catheter collection | wash/flush catheter     | no                                | sterile saline                       | no                                    | no                                     |
|                     | collection medium       | endothelial cell media            | EC growth medium                     | Media + EndoGRO<br>(Milipore Sigma)   | EC growth media<br>(Cell Applications) |
|                     | temperature             | 4 °C                              | 4 °C                                 | 37 °C                                 | 37 °C                                  |
|                     | swirling                | no                                | yes                                  | no                                    | yes                                    |
|                     | temperature             | undefined                         | 4 °C                                 | 37 °C                                 | 37 °C                                  |
|                     | balloon inflation       | no                                | 200µL medium                         | no                                    | yes - air                              |
| Cell harvest        | scraping of the balloon | no                                | yes                                  | no                                    | no                                     |
|                     | trypsin solution        | 0.5% trypsin in PBS               | cell detachment solution             | no                                    | Trypsin-EDTA                           |
|                     | centrifugation          | 10' at 1500 rpm                   | 10' at 650g                          | no                                    | 10' at 500g                            |
|                     | RBC lysis buffer        | yes – ACK-PBS solution            | yes                                  | no                                    | yes - ACK lysis buffer                 |
|                     | use of microbeads       | no                                | anti -CD146                          | no                                    | no                                     |
|                     | final centrifugation    | 10' at 2500 rpm                   | 10' at 500 g                         | no                                    | 10' at 500 g                           |
|                     | use                     | cell sorting                      | fixation, staining, culture          | catheter in culture                   | cells (pellet) in culture              |
| Refreshing medium   |                         | Day after isolation               | NA                                   | Day after isolation                   | 4 days post-isolation                  |

## References

1. Pollett JB, Benza RL, Murali S, Shields KJ, Passineau MJ. Harvest of pulmonary artery endothelial cells from patients undergoing right heart catheterization. *J Heart Lung Transpl.* 2013; 32: 746–749.
2. Passineau MJ, Gallo PH, Williams G, Perez R, Benza RL. Harvest of Endothelial Cells from the Balloon Tips of Swan-Ganz Catheters after Right Heart Catheterization. *J. Vis. Exp.* 2019; 143: e58353.
3. Ventetuolo CE, Aliotta JM, Braza J, Chichger H, Dooner M, McGuirl D, Mullin CJ, Newton J, Pereira M, Princiotta A, Quesenberry PJ, Walsh T, Whittenhall M, Klinger JR, Harrington EO. Culture of Pulmonary Arterial Endothelial Cells from Pulmonary Artery Catheter Balloon Tips: Considerations for Use in Pulmonary Vascular Disease. *Eur. Respir. J.* 2020; 1901313.

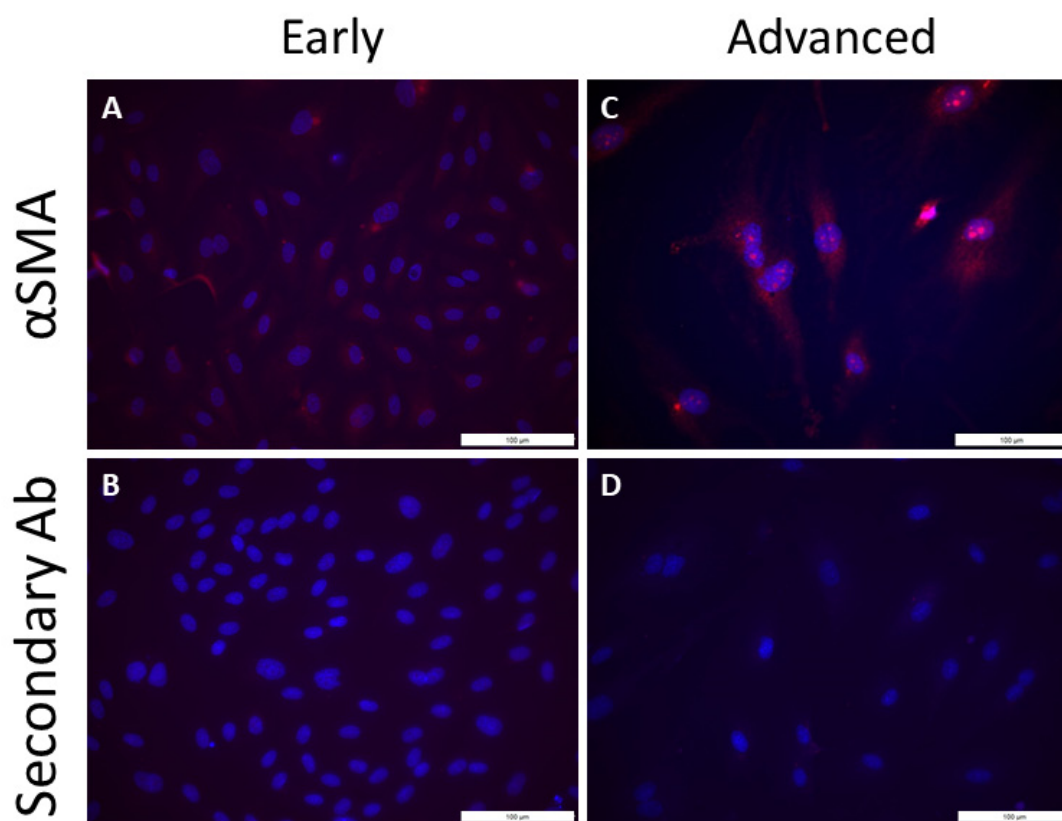

**Figure S1.** PAECs isolated from Swan-Ganz pulmonary catheters in early (**A**, **B**) and advanced subcultures (**C**, **D**), stained with antibodies against  $\alpha$ SMA (**A**, **C**) and in absence of the primary antibody (**B**, **D**). Nuclei were counterstained using DAPI (blue). Scale = 100  $\mu$ m.
